# Supplementary material
Source: PubMed Central journal article supplement (PMC10994790)
Supplement: ajtr0016-0838-f3.pdf [file ajtr0016-0838-f3.pdf]

## Obesity effect on intrauterine PRP efficiency

### PRP Treatment protocol

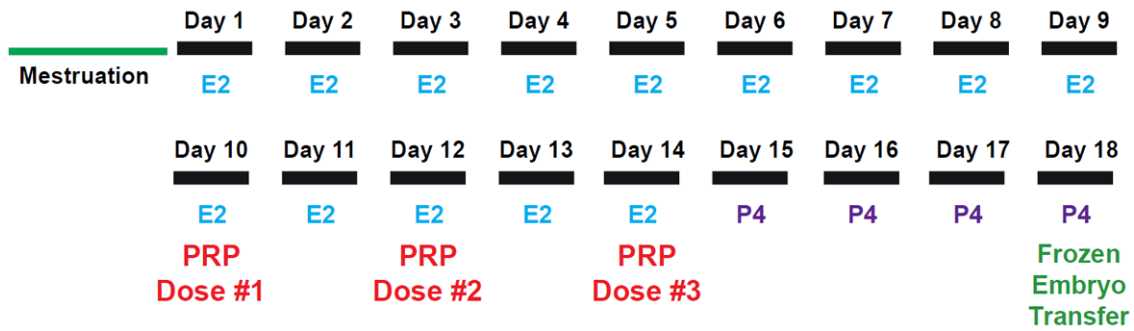

**Supplementary Figure 1.** Platelet Rich Plasma (PRP) treatment protocol for patients with atrophic endometrium under-going estrogenprimed cycle. Endometrial preparation with 6 mg of estrogen valerate was started on the menstrual cycle Day 2 or 3. On the menstrual cycle Day 10, PRP was infused into the uterine cavity. The procedure was repeated on the menstrual cycle Day 12 and 14 until a 7 mm endometrial thickness was reached. Then, progesterone support for the luteal phase was started, and embryos were thawed and transferred on their corresponding development day. Abbreviations: E2: estradiol, PRP: platelet rich plasma, P4: progesterone.

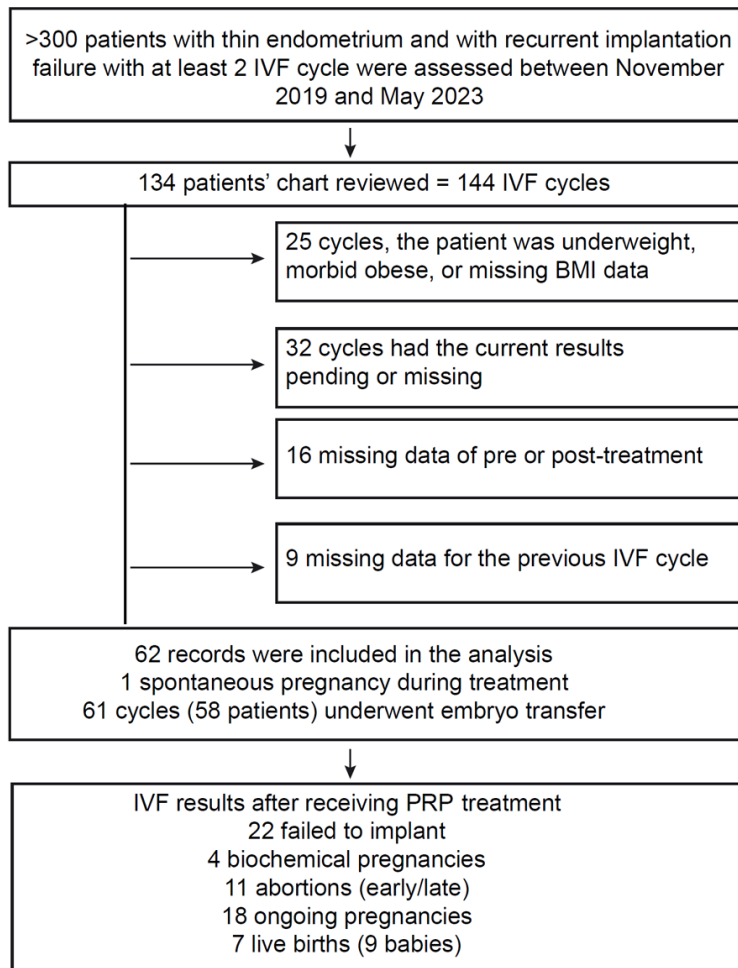

**Supplementary Figure 2.** The study flow chart demonstrating the selection of patients to examine the effect platelet-rich plasma has on endometrium thickness and in vitro fertilization outcomes, following the Strengthening the Reporting of Observational Studies in Epidemiology (STROBE) statement.

## Obesity effect on intrauterine PRP efficiency

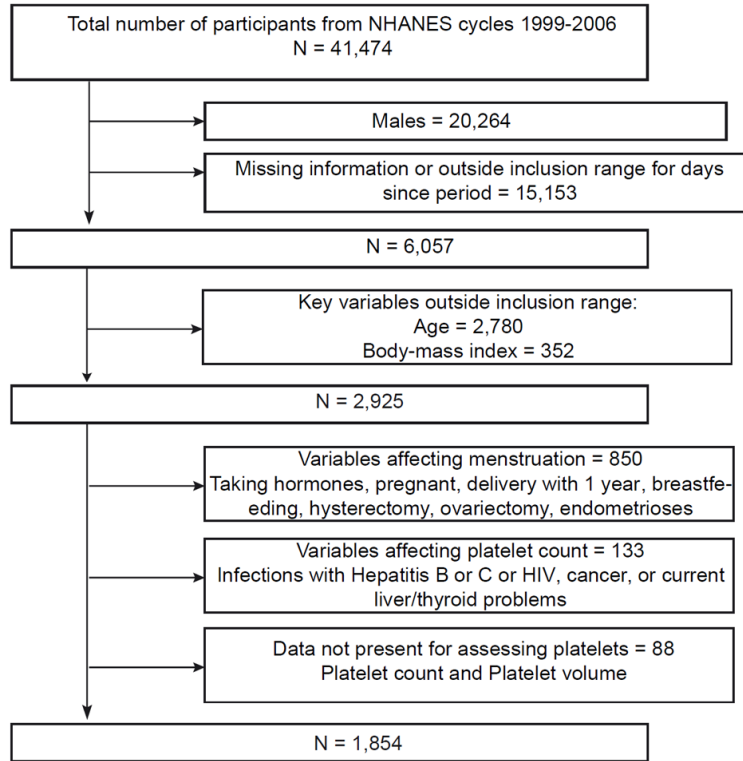

**Supplementary Figure 3.** Flow diagram of the literature search and filtering results for the systematic review of the effectiveness of platelet-rich plasma on implantation and clinical pregnancy rates patients undergoing in vitro fertilization, according to the Preferred Reporting Items for Systematic Reviews and Meta-Analyses (PRISMA) 2020 guidelines.
